# Time-series analysis of abundance indices of young fish

G. Gudmundsson

Gudmundsson, G. 2004. Time-series analysis of abundance indices of young fish. – ICES Journal of Marine Science, 61: 176–183.

Catch-at-age analysis provides estimates of stock size at ages when the fish have reached catchable size. Survey indices contain information about relative cohort size at younger ages. The present analysis is concerned with survey indices of juveniles up to the youngest age where stock estimates, based on time-series analysis of catch-at-age data, are available. A stock estimate at that age from catch-at-age data is also included. A common model of the relationship between stock size and survey indices is combined with the model describing the decline of a stock by natural mortality. Random variations in natural mortality are defined separately from sampling variations and irregular catchability in the survey. The stock size and magnitudes of the random variations are estimated by the Kalman filter, which also provides predictions of future recruitment to the catchable stock. Analysis of observations of Icelandic cod reveals a large deviation from proportionality in the relationship between the index and the stock estimates in the youngest ages, but haddock data are compatible with proportionality. Variations in natural mortality during the second to fourth year of cod and the second to third year of haddock are not a major factor in variations of stock size.

© 2004 International Council for the Exploration of the Sea. Published by Elsevier Ltd. All rights reserved.

Keywords: Icelandic cod, Icelandic haddock, Kalman filter, natural mortality, recruitment.

Received 24 March 2003; accepted 5 December 2003.

G. Gudmundsson: Central Bank of Iceland and Marine Research Institute, Reykjavik, Central Bank of Iceland, Kalkofnsvegur 1, 150 Reykjavik, Iceland; tel: +354 5699694; fax: +354 5699608; e-mail: [gudmg@centbk.is](mailto:gudmg@centbk.is)

## Introduction

Survey indices provide information about relative stock size at the time of the survey. By combining this information with estimates of stock size from catch-at-age analysis, indices of younger fish can be used to predict recruitment to the catchable stock. Various statistical methods have been employed for this purpose (Rosenberg *et al.*, 1992; Shepherd, 1997).

Myers and Cadigan (1993a, b) investigated survey indices of young fish from many stocks. Their analysis was mainly concerned with natural mortality and not with prediction of recruitment, and data or estimates from catch-at-age analysis were not included.

The present methodology is intended for stocks where annual survey indices can be obtained for a few years from each cohort before substantial exploitation begins. Catchability in surveys varies with age and size of the fish, particularly for the youngest ages. Before young fish enter the commercial fishery, their numbers decline due to natural mortality. The indices are subject to measurement errors and irregular variations in catchability. When a survey index is used to predict stock size at an older, catchable age,

irregular variations in natural mortality between these ages contribute to the prediction error. With the time-series methodology, it is possible, at least theoretically, to estimate the magnitude of these variations separately from the irregular component of the survey indices.

We analyse in some detail abundance indices from a trawl survey on Icelandic cod in ages from 1 to 4 years from 1985 to 2002. For comparison with the results of Myers and Cadigan (1993a, b), we also include results from the analysis of haddock in ages from 1 to 3 years. The survey is carried out annually in March and was described by Pálsson *et al.* (1989). The cod data from the Marine Research Institute in Reykjavik (MRI, 2002, Table 3.1.10) are presented in Table 1. Estimates of the stock at 4 years of age, obtained by time-series analysis of catch-at-age data from the same report, are also included in Table 1. When the survey data become available, the last available catch-at-age data are from the previous year. The analysis is carried out in accordance with this, with catch-at-age results from 1985 to 2001. The main spawning period of Icelandic cod is in April. Notice that all fish hatched in year  $t$  are assigned age 0 during that year and 1 at the beginning of year  $t + 1$ . Recruitment estimates provide additional information about

Table 1. Survey indices of Icelandic cod for ages 1–4 and estimates of stock size at age 4 from catch-at-age analysis.

|      | Survey indices |       |       |       | Stock<br>(million fish) |
|------|----------------|-------|-------|-------|-------------------------|
|      | Age 1          | Age 2 | Age 3 | Age 4 |                         |
| 1985 | 16.54          | 112.3 | 35.4  | 48.2  | 104                     |
| 1986 | 15.10          | 61.0  | 95.7  | 22.5  | 108                     |
| 1987 | 3.65           | 28.9  | 104.0 | 83.5  | 248                     |
| 1988 | 3.45           | 7.5   | 72.7  | 104.9 | 206                     |
| 1989 | 4.09           | 17.3  | 22.4  | 80.1  | 131                     |
| 1990 | 5.57           | 12.1  | 26.7  | 14.3  | 68                      |
| 1991 | 3.95           | 16.3  | 18.2  | 30.7  | 102                     |
| 1992 | 0.72           | 17.5  | 33.8  | 19.1  | 75                      |
| 1993 | 3.58           | 4.8   | 35.1  | 39.3  | 135                     |
| 1994 | 13.76          | 16.0  | 8.9   | 27.1  | 98                      |
| 1995 | 1.17           | 29.3  | 26.2  | 9.4   | 57                      |
| 1996 | 3.63           | 5.4   | 41.9  | 28.3  | 126                     |
| 1997 | 1.21           | 22.4  | 13.7  | 56.5  | 133                     |
| 1998 | 7.98           | 5.5   | 29.8  | 16.0  | 73                      |
| 1999 | 7.38           | 34.3  | 7.1   | 42.3  | 140                     |
| 2000 | 18.81          | 28.5  | 55.6  | 7.2   | 46                      |
| 2001 | 12.09          | 24.1  | 37.0  | 38.3  | 145                     |
| 2002 | 0.91           | 38.7  | 41.2  | 40.3  |                         |

the stock size at the youngest age in the catch-at-age analysis used in the management rules for this stock (Baldursson *et al.*, 1996). Predictions made further ahead affect economic planning by fisheries and the government.

The relative magnitudes of the survey indices for cod at each age vary much more than the stock estimates. Higher irregular variations of the indices may have some part in this, but visual examination of Table 1 shows that it is mainly a systematic feature of the data; an index of a cohort that is large or small in any particular year in the indices, retains its relative position during the 4 years included here.

## Model

The number of fish is treated as a continuous variable and the basic model of change in cohort size is

$$dN = -ZN dt,$$

where  $N$  is the number of fish and  $Z$  is the rate of mortality. For interpretation of annual data, it is customary to solve the equation, assuming that  $Z$  is constant during the year, so that

$$N_{at} = N_{a-1,t-1} e^{-Za-1,t-1}. \quad (1)$$

$N_{at}$  is the number of fish of age  $a$  at the beginning of year  $t$  and  $Z_{at}$  is the mortality rate of fish of age  $a$  during year  $t$ .

In the present work, observations consist of survey indices of year-class strength of young fish. One series of estimates of the stock size in numbers in the youngest age where substantial commercial catches begin is also included. This series is based on catch-at-age analysis. They are highly variable in magnitude. In order to stabilize

variances and bring them closer to normality, it is convenient to work with logarithmic values and we denote the logarithmic stock values by  $n_{at}$ . The indices are related with the stock values through the model

$$i_{at} = q_a + \phi_a n_{at} + \varepsilon_{at}. \quad (2)$$

The logarithmic value of the index is  $i_{at}$ . Catchability of the survey ( $q_a$ ) varies with age and we also allow for variation with stock size by the parameter  $\phi_a$ . Irregular variations in catchability are indistinguishable from measurement errors and we include both in the residuals  $\varepsilon_{at}$ , defined as serially uncorrelated, normally distributed with zero mean and variance  $\sigma_{\varepsilon a}^2$ .

The actual age range will usually be from 0 or 1 to an age  $A$ , where estimates of stock size can be obtained from catch-at-age analysis. We cannot estimate absolute stock size in the ages below  $A$  from these data without some further information about the magnitude of catchability or mortality. No such knowledge will be assumed here.

Let us first ignore the possibility that natural mortality depends upon stock size and separate systematic and random variations,

$$Z_{at} = \xi_a + \zeta_{at}, \quad (3)$$

where  $\xi_a$  is a constant age-dependent mortality rate and  $\zeta_{at}$  represents random variations in the mortality, assumed to be normally distributed, serially uncorrelated with zero mean. From Equations (1) and (3) we obtain

$$n_{A,t+A-a} = n_{a,t} - \sum_{i=0}^{A-1-a} (\xi_{a+i} + \zeta_{a+i,t+i}), \quad a < A. \quad (4)$$

Suppose now that  $N_{at}$  is known in year  $t$  and denote the expected log-value of the cohort when it reaches age  $A$  by  $r_{at}$ ,

$$\begin{aligned} r_{at} &= E\{n_{A,t+A-a}|N_{at}\} = n_{at} - \sum_{i=0}^{A-1-a} \xi_{a+i} \\ &= n_{A,t+A-a} + \sum_{i=0}^{A-1-a} \zeta_{a+i,t+i}, \quad a < A, \quad r_{At} = n_{At}. \end{aligned} \quad (5)$$

From Equations (2) and (5) we obtain

$$i_{at} = q_a + \phi_a \sum_{i=0}^{A-1-a} \xi_{a+i} + \phi_a r_{at} + \varepsilon_{at}. \quad (6)$$

Without some external knowledge about the magnitude of catchability and mortality at each age we cannot separate these effects with the present data so we simplify the measurement equations of the indices to

$$i_{at} = Q_a + \phi_a r_{at} + \varepsilon_{at}, \quad (7)$$

where the constants  $Q_a$  include effects of both age-dependent catchability and mortality.

At age  $A$ , the stock has been estimated from catch-at-age analysis. We regard these estimates as observations and denote them by a hat,

$$\hat{n}_{At} = n_{At} + \varepsilon_{nt} = r_{At} + \varepsilon_{n,t}. \quad (8)$$

The errors,  $\varepsilon_{n,t}$ , are defined as normally distributed, independent of  $\varepsilon_{at}$  and serially uncorrelated.

The unobserved variables  $r_{at}$  are called state variables. Their true values are connected by the relationship

$$r_{at} = r_{a-1,t-1} + \delta_{at}. \quad (9)$$

The residual  $\delta_{at} = \zeta_{a-1,t-1}$ , i.e. the difference between  $r_{at}$  and  $r_{a-1,t-1}$ , consists of the irregular component in the natural mortality at age  $a - 1$  during year  $t - 1$ . A separate equation must be defined for the youngest age included in the analysis. Let this be  $a = 1$ . From Equation (5) we have

$$r_{1t} = n_{1t} - \sum_{i=0}^{A-2} \xi_{1+i}. \quad (10)$$

The age-dependent mortality rates  $\xi_{1+i}$  are unknown constant values. The simplest assumption about the unknown values of  $n_{1t}$  is that they are independent, normally distributed with a fixed mean,  $n_0$ , and variance  $\sigma_{\delta_1}^2$ . However, in the present analysis it is not possible to estimate  $n_0$  separately from the unknown value of  $\sum_{i=0}^{A-2} \xi_{1+i}$  and we define

$$r_0 = n_0 - \sum_{i=0}^{A-2} \xi_{1+i}, \quad (11)$$

and

$$r_{1,t} = r_0 + \delta_{1t}, \quad (12)$$

where the residuals  $\delta_{1t}$  have variance  $\sigma_{\delta_1}^2$ . This equation represents our knowledge about the respective cohort before the first observation from it in the survey data, i.e.  $i_{1t}$ . The model could be expanded to include information from a stock-spawning relationship or possible trend but this will not be considered here. The residuals  $\delta_{1t}$  represent irregular variations in spawning and natural mortality before fish reach age 1.

Natural mortality could depend upon stock size as discussed by Myers and Cadigan (1993a). This can be expressed in various ways, but for the present estimation procedure a convenient model is

$$r_{at} = r_{a-1,t-1} + \gamma(r_{a-1,t-1} - r_0) + \delta_{at}, \quad (13)$$

where  $r_{at}$  is now the expected cohort size at age  $A$  apart from the stock-dependent variations in natural mortality, represented by  $\gamma(r_{a-1,t-1} - r_0)$ .

## Estimation

The unobserved series of state variables,  $r_{a,t}$ , are estimated from the observed indices and the catch-at-age estimates at

age  $A$  by means of the Kalman filter. As the present models are linear in the state variables, no modification or extension of the Kalman filter is needed. This algorithm proceeds from initial values by predicting the state variables  $r_{at}$  in the next period by their models with the expected value 0 inserted for the residuals  $\delta_{at}$ . The predicted values of  $r_{at}$  are used to predict the observed indices and  $\hat{n}_{At}$  according to the models in Equations (7) and (8) and to calculate the prediction errors. These errors contain information about the estimates of state variables employed in the predictions. An overprediction of  $i_{at}$  in Equation (7) indicates that  $r_{at}$  was too large and should be adjusted. But the random element, represented by  $\varepsilon_{at}$ , also contributes to the prediction error of  $i_{at}$ . If the variance of  $\varepsilon_{at}$  is large, compared with the uncertainty of the state variable, the adjustment should be small. The function of the Kalman filter is to determine the appropriate updating of the state variables in accordance with the prediction errors of the measurements and to calculate the covariance matrix of the updated estimates. A formal description of the application of the Kalman filter to the present model is given in Appendix 1.

In order to apply the Kalman filter, we need initial values of the state variables in ages from 1 to  $A - 1$  years in the year before the first observations. All parameters in Equations (7), (8), (9), (12), and (13) must be known, including the full specification of the covariance matrices of  $\delta_{at}$  and  $\varepsilon_{at}$ . In reality, these parameters are not known but can be estimated by the likelihood function of the prediction errors, i.e. we find the parameters by which the Kalman filter produces the best predictions of  $i_{at}$  and  $\hat{n}_{At}$ . Approximate standard deviations of estimated parameters are obtained from the Hessian matrix. The estimated covariance matrix of the state variables does not include uncertainty in parameter estimates and tends to underestimate the actual uncertainty, but not by an order of magnitude.

The direct estimation of the stock in Equation (8) is obtained by time-series analysis of the catch-at-age data (Gudmundsson, 1994). The best estimates of this stock at catchable ages are obtained from a joint analysis of these data and the survey indices. However, the uncertainty in specifying the correlation between  $\varepsilon_{n,t}$  from a joint analysis and the residuals  $\varepsilon_{at}$  in Equation (2) counteracts this advantage. In the present analysis, we use stock estimates obtained without using data other than the catch-at-age where we can safely assume that there is no correlation with  $\varepsilon_{at}$ . It is only in the last years that substantial differences may emerge between different estimation procedures.

Time-series estimation of  $n_{At}$  from catch-at-age data also provides estimates of the standard deviation of this estimate. But this estimation is rather inaccurate. It depends upon the method used for stabilizing variances and various somewhat arbitrary specifications of covariance matrices. Estimates of stocks and mortality rates in the last year are less accurate than in previous years, but the reverse applies to the assessment of the accuracy. In the present analysis, the standard deviation of  $\varepsilon_{n,t}$  in the last year, 2001, is

obtained from the catch-at-age analysis. The standard deviation from 1985–1997 is estimated as a constant value  $\sigma_n$ , and the values from 1998–2000 as a linear interpolation between  $\sigma_n$  and the value in 2001.

The number of parameters is high. With four ages included there are two  $4 \times 4$  covariance matrices, two parameters,  $Q_a$  and  $\phi_a$ , for each age in the measurement equations for the indices, and  $\sigma_n$ ,  $r_0$  and  $\gamma$ . With  $T$  years of observations the size of  $T + A - 1$  cohorts must be determined, although only the  $A - 1$  initial values of  $r_{at}$  enter as separate estimated parameters. The number of quantities to be determined is thus very high compared with the number of observations, but this is a common feature of cohort analyses of fish stocks.

It is necessary to introduce various simplifications in order to keep down the number of parameters and obtain well-determined estimates. The likelihood function is used to test the validity of parameter restrictions. The next section describes the specification and estimation with observations of Icelandic cod. Much of this will be common with data from other stocks, but not necessarily every detail.

The values of  $r_{aT}$ , obtained by the Kalman filter in the last year of observation, are our predictions of the recruitment to the stock at age  $A$  in the years from  $T$  to  $T + A - 1$ , based on the whole data set. The Kalman filter estimates of  $r_{at}$  in earlier years are based on the data up to and including year  $t$ . However, subsequent observations contain further information about these values. Estimates of  $r_{at}$ , based on the whole data set, are obtained by a recursive procedure called “smoothing”.

Examination of residuals is an important aspect of applied time-series analysis. Observed residuals are the difference between the observed series and values predicted by the models. In the present analysis, the residuals are the prediction errors of  $i_{at}$  and  $\hat{n}_{At}$  one year ahead. They are composed of the stochastic elements represented by  $\varepsilon_{at}$  and  $\varepsilon_{nt}$  in Equations (7) and (8) and also the errors produced by inaccurate estimation of the state variables  $r_{at}$ . The residuals should be serially uncorrelated with all other residuals, but correlations of the prediction errors at different ages within the year are allowed in the model.

The prediction errors should have zero mean, but the variances differ in accordance with the different variances of the residuals in Equations (7), (8), (9), (12), and (13). The calculated residuals are therefore standardized by dividing by the calculated standard deviation of the respective residuals. Test statistics are calculated jointly for the standardized residuals from Equation (7). Two test statistics for normality are calculated,  $g_1$  for skewness and  $g_2$  for kurtosis. Both are approximately distributed as  $N(0;1)$  under the null hypothesis of normal distribution of the residuals. Two first-order serial correlation coefficients,  $r_t$  and  $r_c$ , are calculated. They represent the correlation between the residual at  $(a,t)$  with the residuals at  $(a, t - 1)$  and  $(a - 1, t - 1)$ , respectively. They are approximately normally distributed with zero mean and variances

$\{A(T - 1)\}^{-1}$  and  $\{(A - 1)(T - 1)\}^{-1}$  under the null hypothesis of no serial correlation (Gudmundsson, 1986).

The Kalman filter, parameter estimation, and smoothing are described in textbooks on time-series analysis (e.g. by Harvey, 1989).

## Examples

We describe here in some detail the parameter estimation and recruitment prediction of Icelandic cod. Parameter estimates for Icelandic haddock, obtained by similar methods, are also presented.

The survey indices of Icelandic cod in Table 1 are calculated in the same way at all ages. Most of the spawning takes place in the weeks immediately after the survey so the youngest age sampled in this survey is 1 year. There is a 0-group survey in August (Astthorsson *et al.*, 1994). The 0-group index is more volatile than the trawl survey indices, and possible misspecification of the relationship with the stock values, including the stochastic aspect, could be damaging for the analysis. It is therefore not included in the present analysis, although the results convey some information about cohort strength.

The standard deviation of the stock estimation at 4 years of age in 2001 from the catch-at-age analysis is 0.17 and the present estimation of  $\sigma_n$  from 1985–1997 is 0.105 (Table 2). This estimate is too high according to the catch-at-age analysis, but as other results are not much affected if we use a lower value for this parameter, only results obtained with this value of  $\sigma_n$  will be presented. As  $\hat{n}_{At}$  refers to the stock at the beginning of the year, the residuals  $\varepsilon_{nt}$  also include irregular mortality until the survey is carried out. But this is not a major factor because catches of 4-year-old cod are small during this period. The assumption of no serial correlation of the residuals in Equation (6) is incorrect for the last values, but they have bigger variances and thus exert less influence upon the results.

For Icelandic cod, we use  $A = 4$  years and must then specify and estimate the  $4 \times 4$  covariance matrix of the residuals  $\varepsilon_{at}$  in Equation (2). These residuals represent measurement errors and variations in catchability. We know from analysis of catch-at-age data and survey indices that estimation of joint variations in catchability from ages 4 to 9 years yields large and highly significant values (Gudmundsson, 1998). The convenient prior assumption of independent residuals is therefore inappropriate.

Estimation of six covariances for the measurement equations with these data is not feasible; one parameter must suffice to account for possible correlations. The present specification defines all  $\varepsilon_{at}$  as independent and adds an extra residual,  $\kappa_{et}$  with variance  $\sigma_{\kappa e}^2$ , to Equation (7),

$$i_{at} = Q_a + \phi_a n_{at} + \varepsilon_{at} + \kappa_{et}. \quad (14)$$

The total variance of the residuals at age  $a$  is then  $\sigma_{\varepsilon a}^2 + \sigma_{\kappa e}^2$  and the covariances are all  $\sigma_{\kappa e}^2$ . The covariance

Table 2. Parameter estimates and residual statistics.  $\theta$  is estimated and  $\gamma$  is fixed in the first cod-column and in the haddock-column. In the second cod-column,  $\theta$  is fixed and  $\gamma$  is estimated. Estimated standard deviations of the parameters are presented in parentheses below the respective parameter values.

|                               | Cod               | Cod               | Haddock          |
|-------------------------------|-------------------|-------------------|------------------|
| $\sigma_{\varepsilon 1}$      | 0.276<br>(0.100)  | 0.285<br>(0.090)  | 0.200<br>(0.094) |
| $\sigma_{\varepsilon, 2-A}$   | 0.068<br>(0.058)  | 0.071<br>(0.058)  | 0.000<br>(0.109) |
| $\sigma_{\kappa \varepsilon}$ | 0.159<br>(0.037)  | 0.158<br>(0.038)  | 0.214<br>(0.098) |
| $\sigma_{\delta 1}$           | 0.387<br>(0.100)  | 0.515<br>(0.106)  | 0.735<br>(0.267) |
| $\sigma_{\delta, 2-A}$        | 0.069<br>(0.026)  | 0.072<br>(0.030)  | 0.082<br>(0.085) |
| $\sigma_{\kappa \delta}$      | 0                 | 0                 | 0                |
| $\sigma_n$                    | 0.106<br>(0.023)  | 0.105<br>(0.026)  | 0.160<br>(0.051) |
| $\varphi_1$                   | 2.31<br>(0.29)    | 1.75<br>(0.15)    | 0.93<br>(0.49)   |
| $\theta$                      | -0.189<br>(0.089) | 0                 | 0.066<br>(0.071) |
| $\gamma$                      | 0                 | -0.091<br>(0.035) | 0                |
| $g_1$                         | -0.61             | -0.61             | 0.08             |
| $g_2$                         | -1.48             | -1.49             | -1.29            |
| $r_1$                         | 0.04              | 0.04              | -0.13            |
| $r_c$                         | -0.17             | -0.15             | 0.10             |

$\sigma_{\varepsilon a}$ : measurement errors and variations in catchability at age  $a$ ;  $\sigma_{\kappa \varepsilon}$ : joint variations in catchability;  $\sigma_{\delta a}$ : irregular variations in natural mortality at age  $a$ ;  $\sigma_{\kappa \delta}$ : joint irregular variations in natural mortality;  $\sigma_n$ : errors in stock estimates from catch-at-age analysis at 4 years' age;  $\varphi_1$ : constant in a model of stock-dependent catchability;  $\gamma$ : coefficient of age in a model of stock-dependent catchability;  $\theta$ : coefficient in age-dependent natural mortality;  $g_1$ : test for skewness,  $N(0;1)$ ;  $g_2$ : test for kurtosis,  $N(0;1)$ ;  $r_1$ : test for first-order serial correlation in time,  $N(0;0.12^2)$  for cod,  $N(0;0.14^2)$  for haddock;  $r_c$ : test for first-order serial correlation within cohorts,  $N(0;0.14^2)$  for cod,  $N(0;0.18^2)$  for haddock.

matrix of the residuals of the state variables is defined in the same way by adding  $\kappa_{\delta t}$  to Equations (9), (12), and (13).

The standard deviation of  $\varepsilon_{1t}$ , representing measurement errors and catchability variations in the survey for the 1-year-old fish, is much higher than for the older fish. The possibility that the large variations at 1 year of age are not highly correlated with variations in the older ages was investigated by excluding  $\kappa_{at}$  when  $a = 1$  and found to fit better. The results for cod presented in our tables were obtained with this option. The residual variations at older ages are highly correlated, indicating that variations in catchability are more important than sampling variations. The possibility of defining the covariance matrix with correlations declining with increasing age-difference was also investigated, but the present formulation was easier to estimate and fitted slightly better.

Free estimation of the ten parameters,  $\sigma_{\varepsilon a}$ ,  $\sigma_{\kappa \varepsilon}$ ,  $\sigma_{\delta a}$ , and  $\sigma_{\kappa \delta}$  produces rather badly determined values for most

parameters. But the restriction to use the same parameter for the standard deviation of  $\varepsilon_{at}$  for ages 2–4 years and another for  $\delta_{at}$  in these ages is acceptable (log L drops by 2.9).

According to the estimated values (Table 2), the variations of natural mortality, represented by  $\sigma_{\delta, 2-4}$ , are much lower than variations in stock size at age 1, represented by  $\sigma_{\delta 1}$ . The variations in cohort size at 4 years of age are therefore dominated by variations in spawning and natural mortality in the first year. There is no indication of correlation within each year between the residuals  $\delta_{at}$ , associated with variations in natural mortality, regardless of the choice of specification.

We are estimating recruitment to  $A = 4$  years for cod in this study but there are also some recorded catches in younger ages. The effect of correcting for catches at 3 years was investigated but had negligible effect upon the goodness-of-fit and did not improve it. The correction was not applied in the results presented here. Unrecorded discards are equivalent to natural mortality in this analysis. Although we cannot determine relative variations in catchability in the younger ages without knowing the natural mortality rate, it is obvious from Table 1 that catchability at 1 year of age is much lower than in the higher ages.

The parameters  $Q_a$  are estimated separately at each age, but as we do not know the relative contribution of regular variations with age in catchability and natural mortality, the values are of little interest. The estimated values of  $\varphi_a$  are of the order of 2 and the log-likelihood function drops by about 30 by fixing all  $\varphi_a = 1$ . The plausible assumption of proportionality between index and stock size is therefore incompatible with these data. But a linear change of  $\varphi_a$  with age is acceptable so we can represent the four values by two parameters,

$$\varphi_a = \varphi_1 + \theta(a - 1). \quad (15)$$

The estimated values of  $\theta$  in Table 2 are obtained by assuming that natural mortality is not stock-dependent, i.e. with  $\gamma = 0$ . Joint estimation of  $\theta$  and  $\gamma$  results in insignificant values of both parameters. The negative value of  $\theta$  implies that stock-dependent catchability decreases with increasing age. For cod, results of estimation with  $\theta$  fixed at 0 are also presented in Table 2. A negative  $\gamma$  implies that natural mortality of large cohorts is higher than for small cohorts. Most other parameters are little affected by which of the variables  $\theta$  or  $\gamma$  is included, but the initial stock-size variation, represented by  $\sigma_{\delta 1}$ , is bigger with  $\gamma$ . The variation subsequently decreases with age because of the stock-dependent mortality. Note that  $\varphi_1$  is much bigger than 1 so that the catchability is still strongly stock-dependent. Log L differs by 0.2 depending on whether  $\gamma$  or  $\theta$  is estimated, which is negligible. It is therefore not possible, with the present data and models, to distinguish between variation with age of stock-dependent catchability in the survey, and stock-dependent natural mortality.

The smoothed estimates of  $r_{at}$ , obtained with  $\gamma = 0$ , are presented in Table 3, transformed from logarithmic values

Table 3. Smoothed estimates of  $\exp(r_{at})$  for Icelandic cod when variation with age of stock-dependent catchability is estimated.

| Year | Million fish |           |           |           |
|------|--------------|-----------|-----------|-----------|
|      | 1-yr olds    | 2-yr olds | 3-yr olds | 4-yr olds |
| 1985 | 201          | 225       | 101       | 117       |
| 1986 | 154          | 211       | 217       | 101       |
| 1987 | 77           | 152       | 221       | 217       |
| 1988 | 94           | 73        | 162       | 215       |
| 1989 | 92           | 94        | 77        | 156       |
| 1990 | 107          | 90        | 101       | 71        |
| 1991 | 104          | 106       | 84        | 106       |
| 1992 | 54           | 106       | 112       | 81        |
| 1993 | 101          | 55        | 107       | 117       |
| 1994 | 145          | 103       | 57        | 102       |
| 1995 | 64           | 142       | 105       | 57        |
| 1996 | 107          | 65        | 137       | 111       |
| 1997 | 59           | 111       | 67        | 139       |
| 1998 | 139          | 58        | 107       | 70        |
| 1999 | 131          | 143       | 50        | 121       |
| 2000 | 145          | 133       | 144       | 47        |
| 2001 | 158          | 137       | 132       | 139       |
| 2002 | 56           | 161       | 132       | 131       |

to stock size in numbers. The variations in these values within each cohort represent the estimated effects of the irregular variations in natural mortality, denoted by  $\delta_{at}$  in Equation (9). The same estimates, obtained with stock-dependent natural mortality, are presented in Table 4. The variations within cohorts in this table are the estimated effects of stock-dependent and irregular variations in natural mortality.

Table 4. Smoothed estimates of  $\exp(r_{at})$  for Icelandic cod when variation with age of stock-dependent natural mortality is estimated.

| Year | Million fish |           |           |           |
|------|--------------|-----------|-----------|-----------|
|      | 1-yr olds    | 2-yr olds | 3-yr olds | 4-yr olds |
| 1985 | 254          | 266       | 101       | 117       |
| 1986 | 176          | 245       | 234       | 101       |
| 1987 | 69           | 165       | 238       | 217       |
| 1988 | 91           | 68        | 170       | 215       |
| 1989 | 87           | 93        | 74        | 156       |
| 1990 | 109          | 87        | 100       | 71        |
| 1991 | 105          | 107       | 82        | 106       |
| 1992 | 44           | 106       | 113       | 81        |
| 1993 | 101          | 48        | 108       | 117       |
| 1994 | 161          | 103       | 53        | 102       |
| 1995 | 55           | 151       | 105       | 57        |
| 1996 | 109          | 59        | 142       | 111       |
| 1997 | 49           | 112       | 64        | 139       |
| 1998 | 156          | 52        | 108       | 70        |
| 1999 | 143          | 154       | 47        | 122       |
| 2000 | 160          | 140       | 149       | 47        |
| 2001 | 183          | 146       | 135       | 138       |
| 2002 | 46           | 177       | 136       | 131       |

The Kalman filter provides standard deviations of the estimated values of  $r_{at}$ . They refer to the relative size of the cohort at age  $a$  in year  $t$ . These values are also predictions of the size of the cohort when it reaches age  $A$  but the standard deviations of the predictions are bigger because of irregular variations in natural mortality from  $t$  until  $t + A - a$ . In the estimation with  $\gamma = 0$ , these standard deviations for cod are as follows:

| a                | 1    | 2    | 3    | 4    |
|------------------|------|------|------|------|
| $r_{a,2002}$     | 0.13 | 0.05 | 0.06 | 0.06 |
| $n_{4,2002+4-a}$ | 0.18 | 0.11 | 0.09 | 0.06 |

The last row of Table 3 shows the predictions of the stock size at 4 years of age in the years 2005, 2004, 2003, and 2002, obtained from the survey values of 2002. Table 5 shows similar predictions obtained with survey indices ending in 1998–2002 and the corresponding stock estimates ending in 1997–2001. The specifications were the same as in Table 3, but the parameters were reestimated for each data set.

For comparison with these results and the results from Myers and Cadigan (1993a, b) we also analysed haddock indices from the same survey. The time period was the same but the age range was from 1 to 3 years. The estimated standard deviation of the log-value of the stock at 3 years of age in 2002 from catch-at-age analysis was 0.23. Catchability of haddock at 1 year of age is much higher than for cod and the joint variations in catchability, represented by  $\kappa_{et}$ , were included at all ages. No evidence of stock-dependent catchability or natural mortality appears in the haddock results, i.e.  $\phi_1$  is not significantly different from 1 and  $\theta$  and  $\gamma$  are not significantly different from 0.

The test statistics show no evidence of non-normality or serial correlation in the analyses of these data sets.

## Discussion

The data employed in the present work could also be used with other methods currently applied to predict recruitment.

Table 5. Recruitment predictions of Icelandic cod at age 4 years.

|                       | Million fish   |                |                |                | $\hat{N}_{4t}$ |
|-----------------------|----------------|----------------|----------------|----------------|----------------|
|                       | $\exp(r_{1T})$ | $\exp(r_{2T})$ | $\exp(r_{3T})$ | $\exp(r_{4T})$ |                |
| 1998                  | 127            | 62             | 106            | 67             | 73             |
| 1999                  | 126            | 143            | 55             | 111            | 140            |
| 2000                  | 189            | 138            | 148            | 50             | 46             |
| 2001                  | 151            | 143            | 135            | 141            | 145            |
| 2002                  | 56             | 160            | 132            | 131            |                |
| $\sigma(\text{pred})$ | 0.18           | 0.11           | 0.09           | 0.06           |                |

The Kalman filter provides estimates of the standard deviation of  $r_{aT}$  but the error in the prediction of the logarithmic value of the stock at 4 years of age also includes the uncertainty caused by irregular natural mortality. This is included in  $\sigma(\text{pred})$ .

But unless random variations of natural mortality and joint catchability variations are negligible, these methods are not fully efficient because assumptions of independent residuals in their specifications are violated.

Our description and examples of this procedure were in terms of indices from a single survey. The basic theory is the same with indices from more than one survey for some or all of the ages, provided they are carried out at the same time. In view of the large correlations between the residuals associated with the present survey indices, the possibility of correlations between indices of different surveys should be investigated and taken into account. There are no methodological difficulties in carrying this out.

Joint analysis of indices from surveys, carried out at different times in the year, requires more extensive modification of the methodology. In order to keep variations in natural mortality separate from measurement errors and variations in catchability, the state variables  $r_{at}$  should be updated at the time of each survey so we would no longer be working with time intervals of 1 year. However, the results of Myers and Cadigan (1993b) and the present paper indicate that irregular variations in natural mortality may often be so small that it is harmless to ignore them in recruitment predictions. It is not necessary that each survey includes all ages or that they all start in the same year.

Our results for cod differ in two respects from those of Myers and Cadigan (1993a, b). We find a small but significant irregular variation in natural mortality and a strong stock-dependence in catchability. In both cases, the difference rests upon the information in the series of stock estimates from the catch-at-age data, included in our analysis but not in the work of Myers and Cadigan. If we reduce the effect of this series by assigning a bigger variance ( $\sigma_n^2$ ) to the stock estimates, the estimated variance in natural mortality ( $\sigma_{\delta,2-4}^2$ ) becomes insignificant. Myers and Cadigan (1993a) assume that the estimated abundance in the survey is proportional to the true abundance, i.e.  $\phi_1 = 1$ . According to our results, this assumption is untenable for Icelandic cod. However, this conclusion also rests upon the information from the catch-at-age estimation. It was carried out with the traditional assumption of a constant natural mortality ( $0.2 \text{ year}^{-1}$ ) in the catchable ages. If this assumption is wrong and the natural mortality is in fact strongly stock-dependent, then the stock estimates, based on the assumption of a constant natural mortality, are systematically wrong and the evidence for stock-dependent catchability could vanish. It is difficult to estimate the magnitude or the variations in natural mortality in ages with high fishing mortality. At the moment, we have no presentable evidence for or against the hypothesis of stock-dependent natural mortality of Icelandic cod in the catchable sizes and ages ( $> 50 \text{ cm}$ ,  $\geq 4 \text{ years}$ ).

For Icelandic haddock, we find no significant irregular variation in natural mortality. The precision of this estimation is lower for haddock than for cod because we have one age less in the survey data and less accurate catch-

at-age estimates. It is therefore not possible to infer from the present analysis that the actual variations are in fact smaller for haddock than for cod. There is no indication of stock-dependent catchability or natural mortality for haddock. This is in agreement with the results from most of the haddock stocks investigated by Myers and Cadigan (1993a). In view of the difference between the results from Icelandic cod and haddock in these respects, it is worth noting that catchability in our survey is much higher for haddock than for cod. The stock in numbers of cod is bigger than the stock of haddock, but the survey catches five times more haddocks than cods.

## References

- Astthorsson, O. S., Gislason, A., and Gudmundsdottir, A. 1994. Distribution, abundance and length of pelagic juvenile cod in Icelandic waters in relation to environmental conditions. ICES Marine Science Symposium, 198: 529–541.
- Baldursson, F. M., Stefánsson, G., and Daniélfsson, Á. 1996. On the rational utilization of the Icelandic cod stock. ICES Journal of Marine Science, 53: 643–658.
- Gudmundsson, G. 1986. Statistical considerations in the analysis of catch-at-age observations. Journal du Conseil International pour l'Exploration de la Mer, 43: 83–90.
- Gudmundsson, G. 1994. Time series analysis of catch-at-age observations. Applied Statistics, 43: 117–126.
- Gudmundsson, G. 1998. Joint time series analysis of catch-at-age and CPUE data. In Fishery Stock Assessment Models. University of Alaska Sea Grant College Program AK-SG-98-01. pp. 199–218.
- Harvey, A. C. 1989. Forecasting, Structural Time Series Models and the Kalman Filter. Cambridge University Press, Cambridge.
- Marine Research Institute. 2002. State of Marine Stocks in Icelandic Waters 2001/2002. Prospects for the quota Year 2002/2003. (In Icelandic with English summary). Hafrannsóknastofnun, Fjölrit nr. 75.
- Myers, A. M., and Cadigan, N. G. 1993a. Density-dependent mortality in marine demersal fish. Canadian Journal of Fisheries and Aquatic Sciences, 50: 1576–1590.
- Myers, A. M., and Cadigan, N. G. 1993b. Is juvenile natural mortality in marine demersal fish variable? Canadian Journal of Fisheries and Aquatic Sciences, 50: 1591–1598.
- Pálsson, Ó. K., Jónsson, E., Schopka, S. A., Stefánsson, G., and Steinarsson, B.Æ. 1989. Icelandic groundfish survey data used to improve precision in stock assessment. Journal of Northwest Atlantic Fishery Science, 9: 53–72.
- Rosenberg, A. A., Kirkwood, R. M., Cook, R. M., and Myers, R. A. 1992. Combining information from commercial catches and research surveys to estimate recruitment; a comparison of methods. ICES Journal of Marine Science, 49: 379–387.
- Shepherd, J. G. 1997. Prediction of year-class strength by calibration regression analysis of multiple recruit index series. ICES Journal of Marine Science, 54: 741–752.

## Appendix 1

### The Kalman filter algorithm

For each year, we have a vector of observations,

$$\mathbf{i}_t = (i_{1t}, \dots, i_{At}, \hat{n}_{At})'$$

The observed series are connected with the unobserved series of state variables,

$$\mathbf{r}_t = (r_{1t}, \dots, r_{At})'$$

by the relationship

$$\mathbf{i}_t = \mathbf{H}\mathbf{r}_t + \mathbf{Q} + \boldsymbol{\varepsilon}_t.$$

The coefficient matrix  $\mathbf{H}$  is determined by Equations (7) and (8). The diagonal elements are  $\phi_a$  in the first  $A$  rows. The  $A$ th element in row  $A + 1$  is 1. All remaining elements are 0. The first  $A$  elements of the vector  $\mathbf{Q}$  are  $Q_a$  and the last is 0. The residuals have covariance matrix  $\mathbf{E}_t$ . The first  $A$  rows and columns are occupied by the covariance matrix of the residuals  $\varepsilon_{at}$ . The last diagonal element is the variance of  $\varepsilon_{n,t}$  and the off-diagonal elements in the last row and column are 0 if the stock estimates  $\hat{n}_{At}$  are independent of the survey indices.

The state vectors in year  $t$  are connected with previous values by

$$\mathbf{r}_t = \mathbf{G}\mathbf{r}_{t-1} + \mathbf{r}_0 + \boldsymbol{\delta}_t.$$

The coefficient matrix  $\mathbf{G}$  has elements  $g_{21} = \dots = g_{A,A-1} = 1$  and the remaining elements are 0. The first element of the vector  $\mathbf{r}_0$  is  $r_0$  and the remaining elements 0. The covariance matrix of  $\boldsymbol{\delta}_t$  is  $\mathbf{D}_t$ .

Suppose now that we have estimated  $\mathbf{r}_{t-1}$  by  $\hat{\mathbf{r}}_{t-1}$  with covariance matrix  $\mathbf{P}_{t-1}$ . We can then predict the next state variables by

$$\mathbf{r}_{t|t-1} = \mathbf{G}\hat{\mathbf{r}}_{t-1} + \mathbf{r}_0.$$

The error of this estimate has covariance matrix

$$\mathbf{P}_{t|t-1} = \mathbf{G}\mathbf{P}_{t-1}\mathbf{G}' + \mathbf{D}_t.$$

We predict the vector of observations in year  $t$  by

$$\hat{\mathbf{i}}_t = \mathbf{H}\mathbf{r}_{t|t-1} + \mathbf{Q}.$$

The prediction errors,

$$\mathbf{d}_t = \mathbf{i}_t - \hat{\mathbf{i}}_t,$$

have covariance matrix

$$\mathbf{F}_t = \mathbf{H}\mathbf{P}_{t|t-1}\mathbf{H}' + \mathbf{E}_t.$$

The prediction errors contain additional information about  $\mathbf{r}_t$  and we update the predicted value by

$$\hat{\mathbf{r}}_t = \mathbf{r}_{t|t-1} + \mathbf{P}_{t|t-1}\mathbf{H}'\mathbf{F}_t^{-1}\mathbf{d}_t,$$

with covariance matrix

$$\mathbf{P}_t = \mathbf{P}_{t|t-1} - \mathbf{P}_{t|t-1}\mathbf{H}'\mathbf{F}_t^{-1}\mathbf{H}\mathbf{P}_{t|t-1}.$$

The log-likelihood function is

$$\log L = \text{const.} - \frac{1}{2} \sum_{t=1}^T [\log |\mathbf{F}_t| + \mathbf{d}_t' \mathbf{F}_t^{-1} \mathbf{d}_t].$$
